# Supplementary material for: Noncovalently grafting sulfonic acid onto graphene oxide for improved hole transport in polymer solar cells
Source: Royal Society of Chemistry journal article supplement (doi:10.1039/c4ra11305e), 2014-10-10
Supplement: c4ra11305e1.pdf [file c4ra11305e1.pdf]

**Electronic Supplemental Information for:**

**Noncovalently grafting sulfonic acid onto graphene oxide toward  
improved hole transport in polymer solar cells**

**Minghua Li<sup>\*a</sup>, Zhixiong Liu<sup>b</sup>, Juling Ruan<sup>c</sup>, Xiang Chen<sup>b</sup>, Fangda Xu<sup>b</sup>, Xia Chen<sup>a</sup>, Xing Lu<sup>c</sup>,  
and Shangfeng Yang<sup>\*b</sup>**

<sup>a</sup> *Department of Chemistry and Materials Engineering, Hefei University, Hefei 230601, China*

<sup>b</sup> *Hefei National Laboratory for Physical Sciences at Microscale, CAS Key Laboratory of  
Materials for Energy Conversion & Department of Materials Science and Engineering, University  
of Science and Technology of China (USTC), Hefei 230026, China*

<sup>c</sup> *State Key Laboratory of Materials Processing and Die & Mould Technology, School of Materials  
Science and Engineering, Huazhong University of Science and Technology, Wuhan 430074, China.*

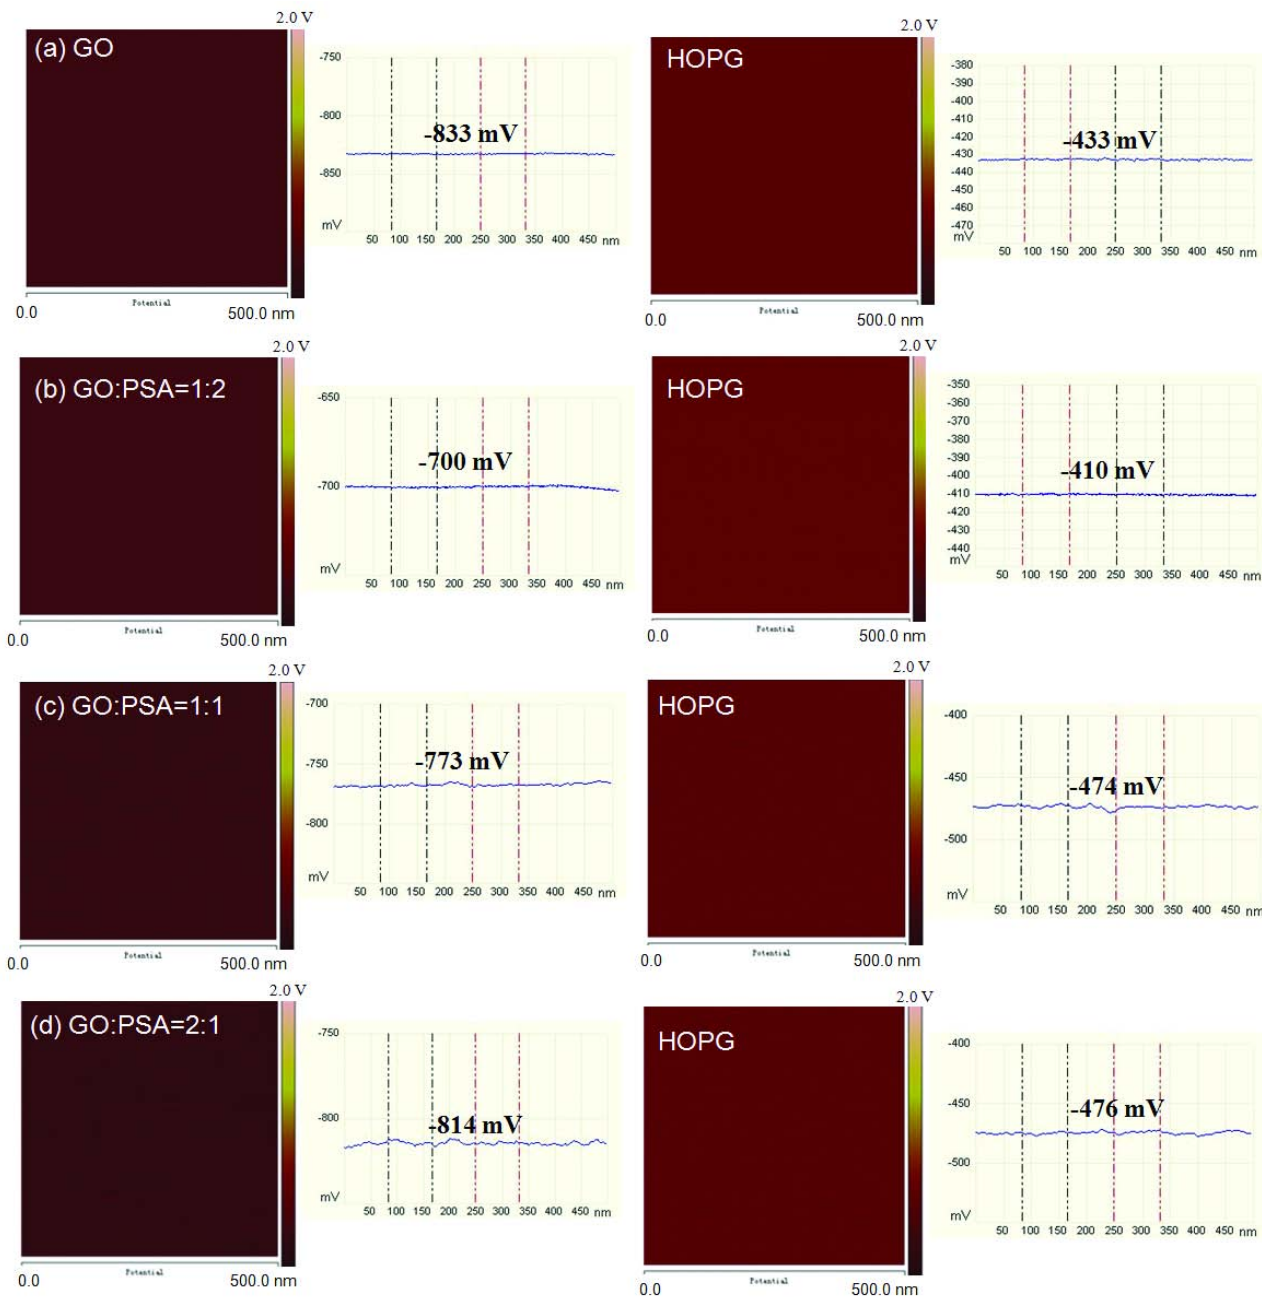

**Fig. S1.** Surface potential images of GO-PSA HTLs with different GO:PSA ratio of 1:2 (b), 1:1 (c) and 2:1 (d) in comparison with that of pristine GO (a). To ensure the accuracy eliminating the influence of the tip, the surface potential image of the individual HOPG used in the corresponding measurement in (a)-(d) was measured prior to the sample measurement, and their images are shown in the right panels of (a)-(d).

**Table S1.** The surface potentials and work functions of different GO-PSA HTLs.

|                                           | reference |                   | GO-PSA <sup>a</sup> |                   |            |                   |            |                   |
|-------------------------------------------|-----------|-------------------|---------------------|-------------------|------------|-------------------|------------|-------------------|
|                                           | GO        | HOPG <sup>b</sup> | GO:PSA=1:2          | HOPG <sup>a</sup> | GO:PSA=1:1 | HOPG <sup>b</sup> | GO:PSA=2:1 | HOPG <sup>b</sup> |
| Surface potential (SP, mV)                | -833      | -433              | -700                | -410              | -773       | -474              | -814       | -476              |
| $\Delta$ SP <sup>c</sup>                  | -400      |                   | -290                |                   | -299       |                   | -338       |                   |
| Work function <sup>d</sup> ( $\Phi$ , eV) | 5.00      | 4.60              | 4.89                | 4.60              | 4.90       | 4.60              | 4.94       | 4.60              |

<sup>a</sup> PSA was added with variable weight ratios (2:1, 1:1, 1:2, w/w) into the GO dispersions in DI water with fixed concentration of 0.20 wt%;

<sup>b</sup> HOPG (highly oriented pyrolytic graphite) was used as a reference with the work function of 4.6 eV;

<sup>c</sup>  $\Delta$ SP is surface potential change of sample relative to HOPG.  $\Delta$ SP=SP(sample) – SP(HOPG);

<sup>d</sup>  $\Phi = \Phi_0 - e\Delta$ SP, where  $\Phi_0$  is the work function of HOPG (4.6 eV).
